# Supplementary material
Source: Frontiers journal article supplement (https://www.frontiersin.org/articles/290189)
Supplement: Image_1.pdf [file Image_1.pdf]

**A**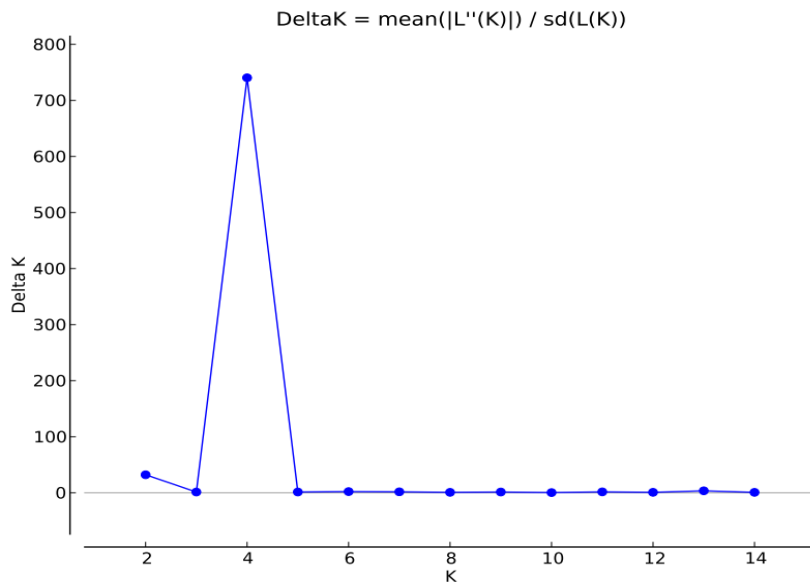**B**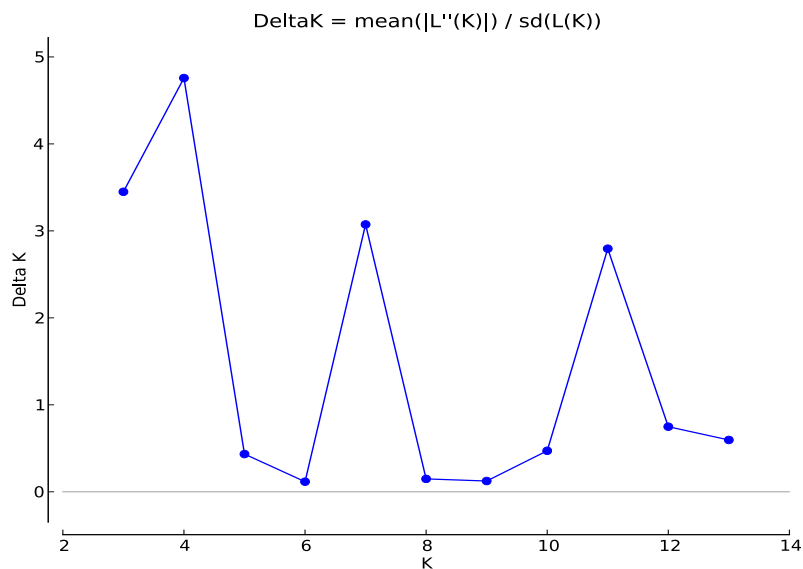

**Figure S1:**  $\Delta K$  plots obtained from Evanno method **(A)** Corpoica's collection, **(B)** Consense population with simulated data for reference population. Graph of delta K values (y-axis) against assumed sub-populations (x-axis) showing the ideal number of groups present in the *Theobroma cacao* population using of 87 and 78 polymorphic SNPs, respectively. The highest peak is K=4 for both data sets.
